# Supplementary material for: An integrative piRNA analysis of mouse gametes and zygotes reveals new potential origins and gene regulatory roles
Source: PubMed Central journal article supplement (PMC6110870; doi:10.1038/s41598-018-31032-1), 2018-08-27
Supplement: 41598_2018_31032_MOESM1_ESM.pdf [file 41598_2018_31032_MOESM1_ESM.pdf]

**An integrative piRNA analysis of mouse gametes and zygotes reveals new potential origins and gene regulatory roles.**

**Eduardo Larriba & Jesús del Mazo**

**Supplementary information**

**Supplementary Figure 1. Sequence lengths and nucleotide distributions of the immunoprecipitation piRNA database**

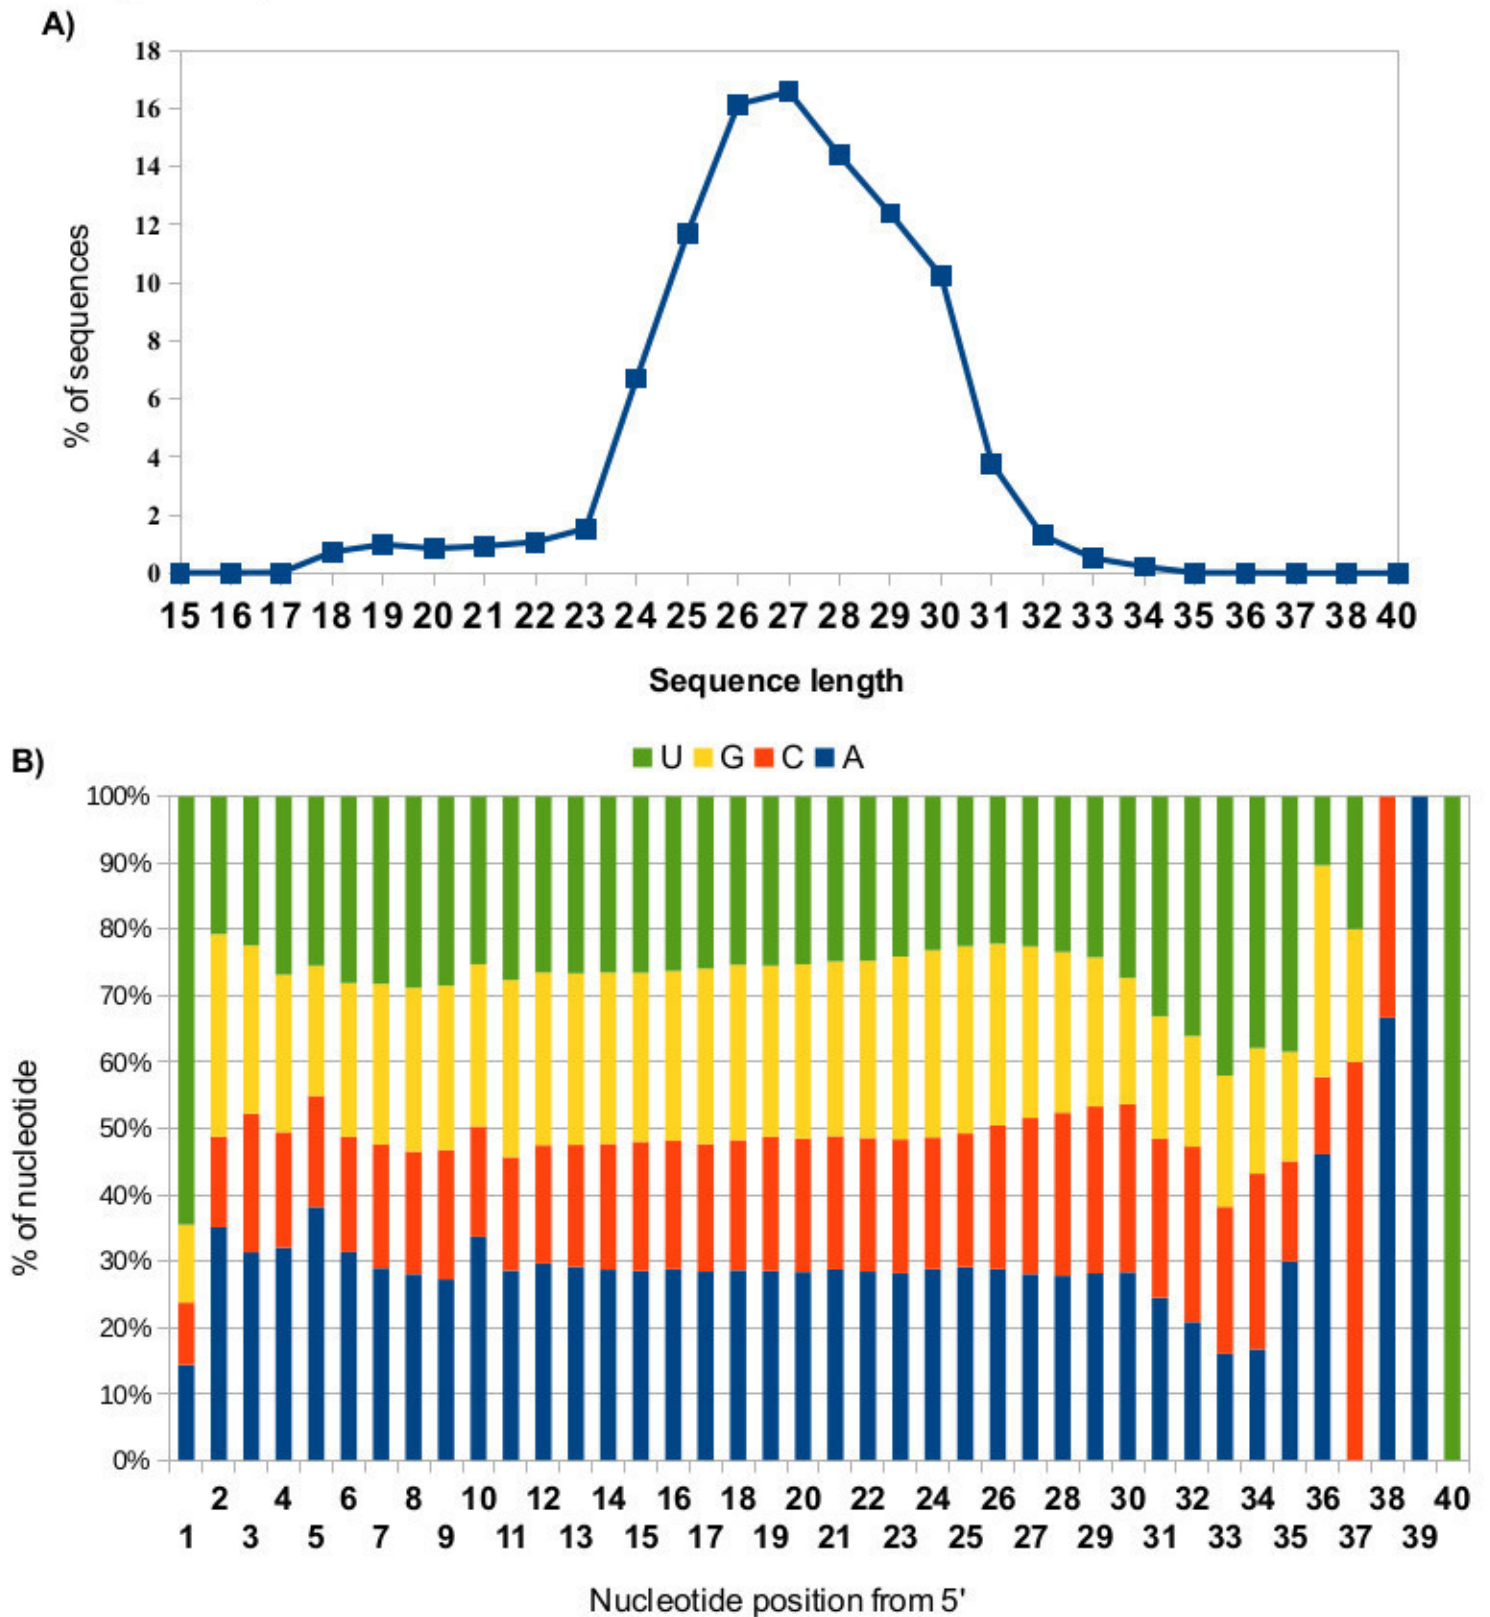

A) Graph shows the classified sequence percentages according to length. Sequence lengths consistent with the IPpiRNA database were calculated using the `basic_analysis.pl` script of the `small RNA` group package ([http://www.anthropologie.uni-mainz.de/487\\_ENG\\_HTML.php](http://www.anthropologie.uni-mainz.de/487_ENG_HTML.php)). B) Nucleotide frequencies of the piRNAs sequences contained in the IPpiRNA database. Sequence percentages shown in relation to the total number of sequences appearing in the database (16,033,825 sequences).

**Supplementary Figure 2. Small RNA-Seq library piRNA bioinformatics pipeline analysis**

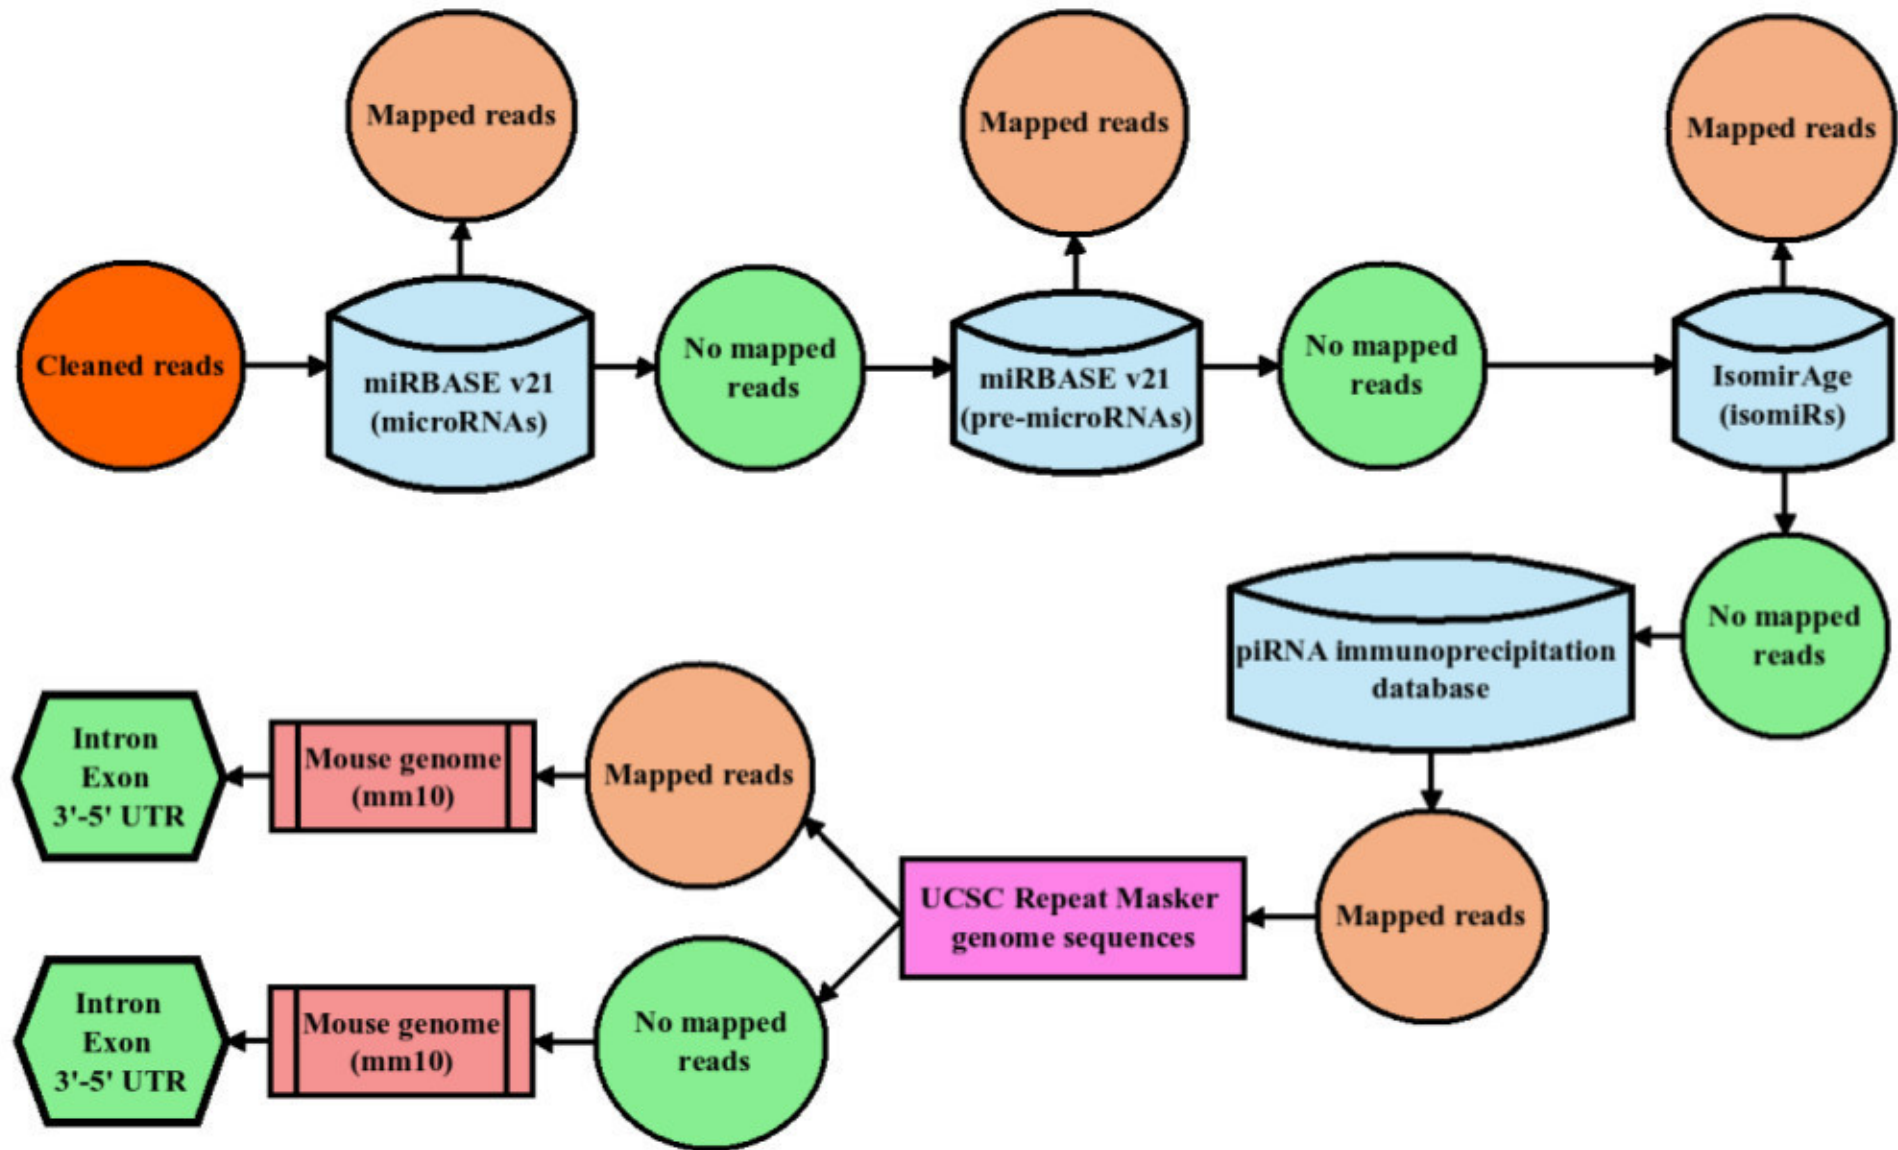

Bioinformatics workflow to identify piRNAs, classification and genomic structural annotation of sncRNAs.

Supplementary Figure 3. tRNA derived piRNA hierarchical clustering regarding oocytes, zygotes and sperm cells.

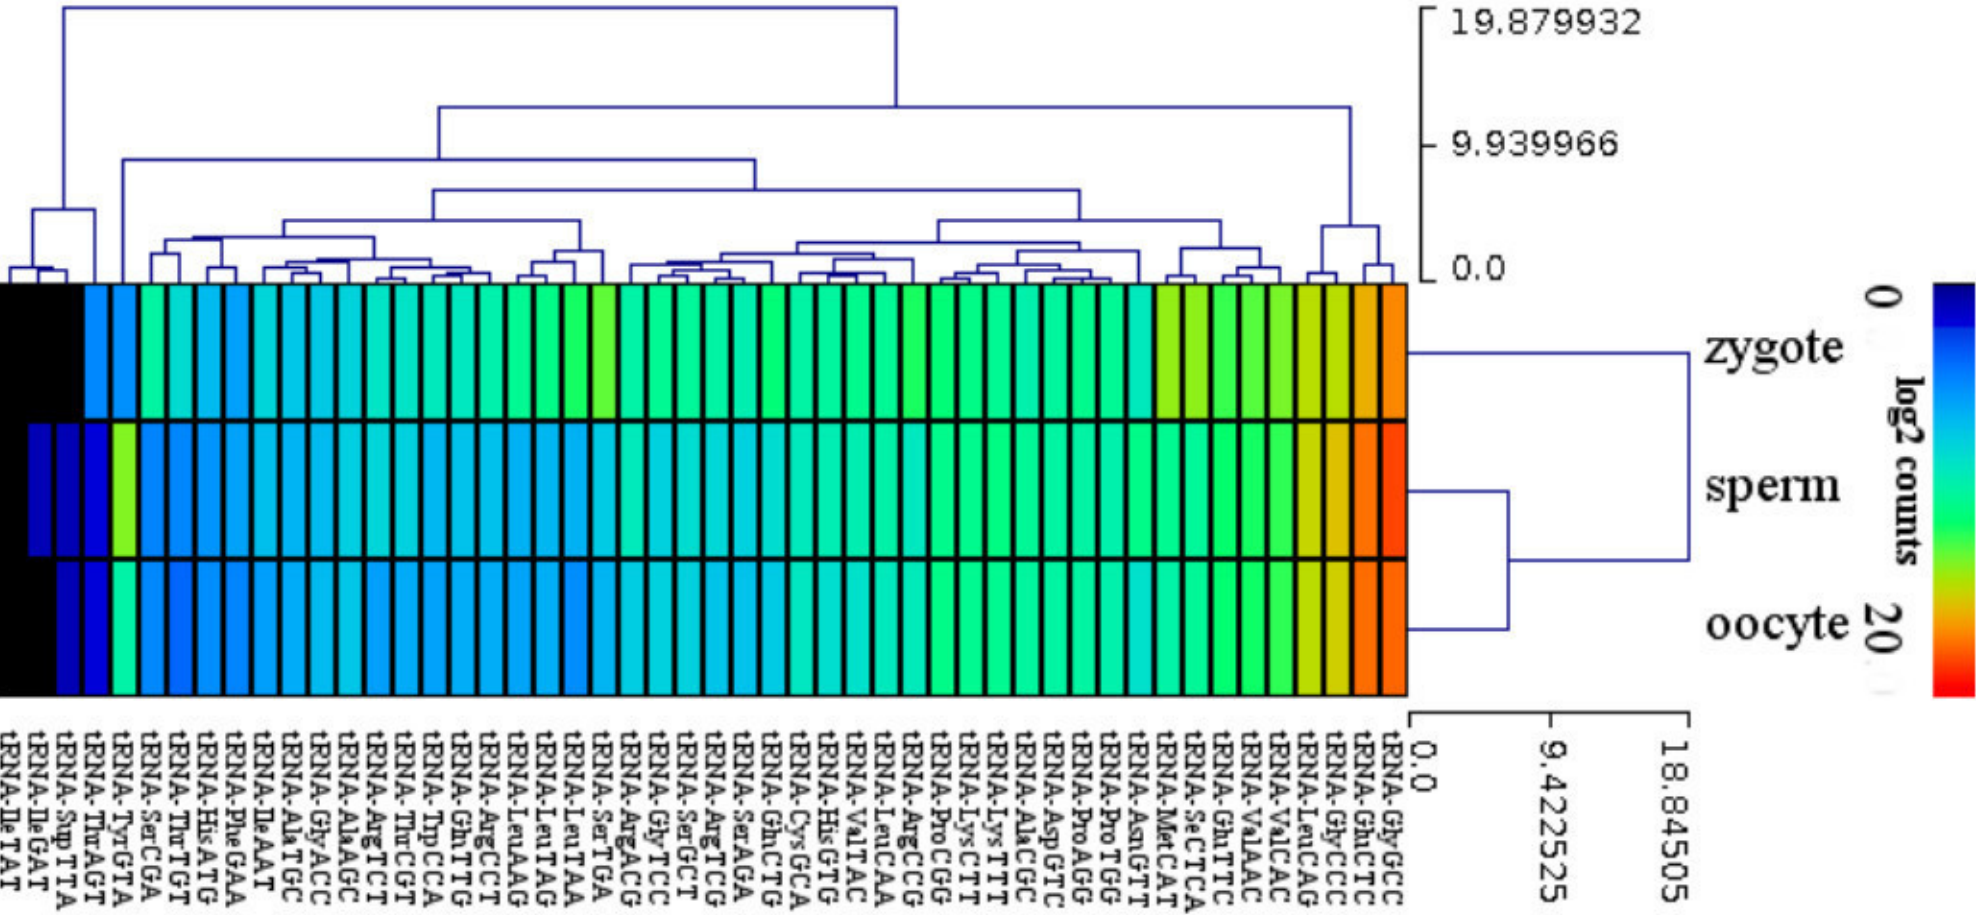

**Supplementary Figure 4. Venny diagram of UTRs regions containing piRNAs with reference to oocytes, zygotes and sperm cells**

**A) RapiRNA**

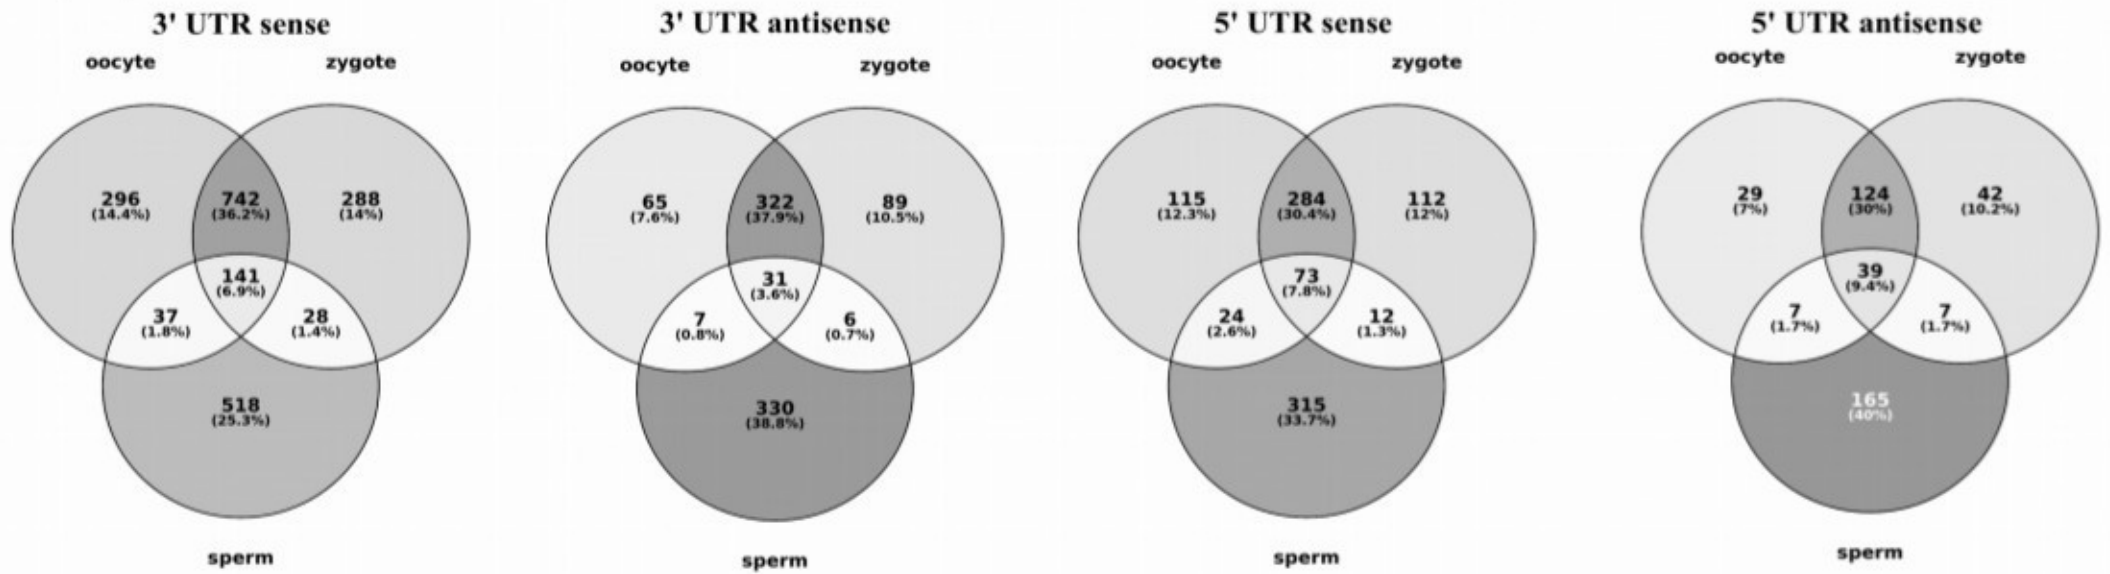

**B) NRapiRNA**

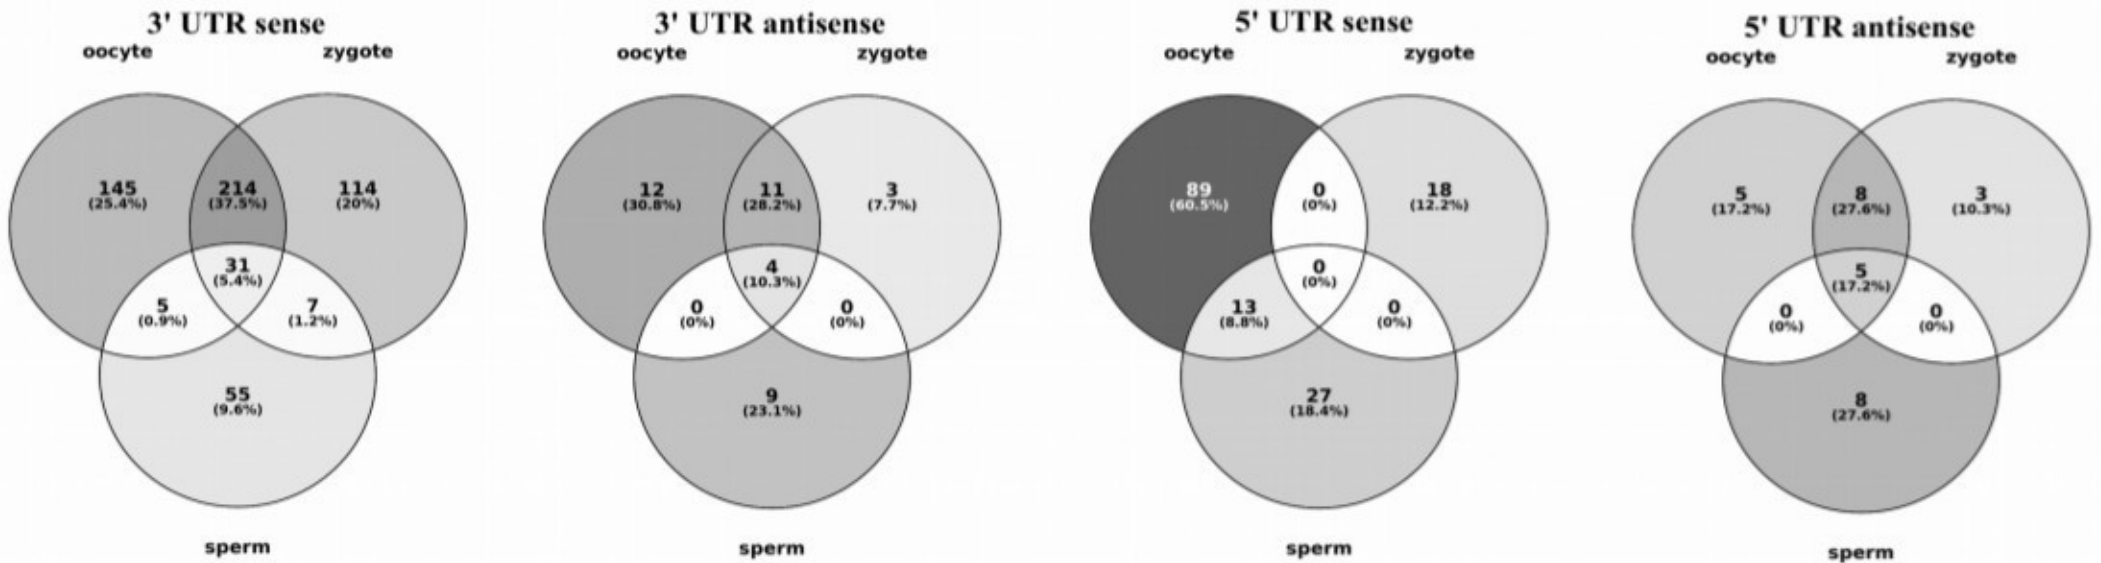

Supplementary Figure 5. KEGG enrichment analysis of transcripts including RapiRNAs in their 3'UTR regions

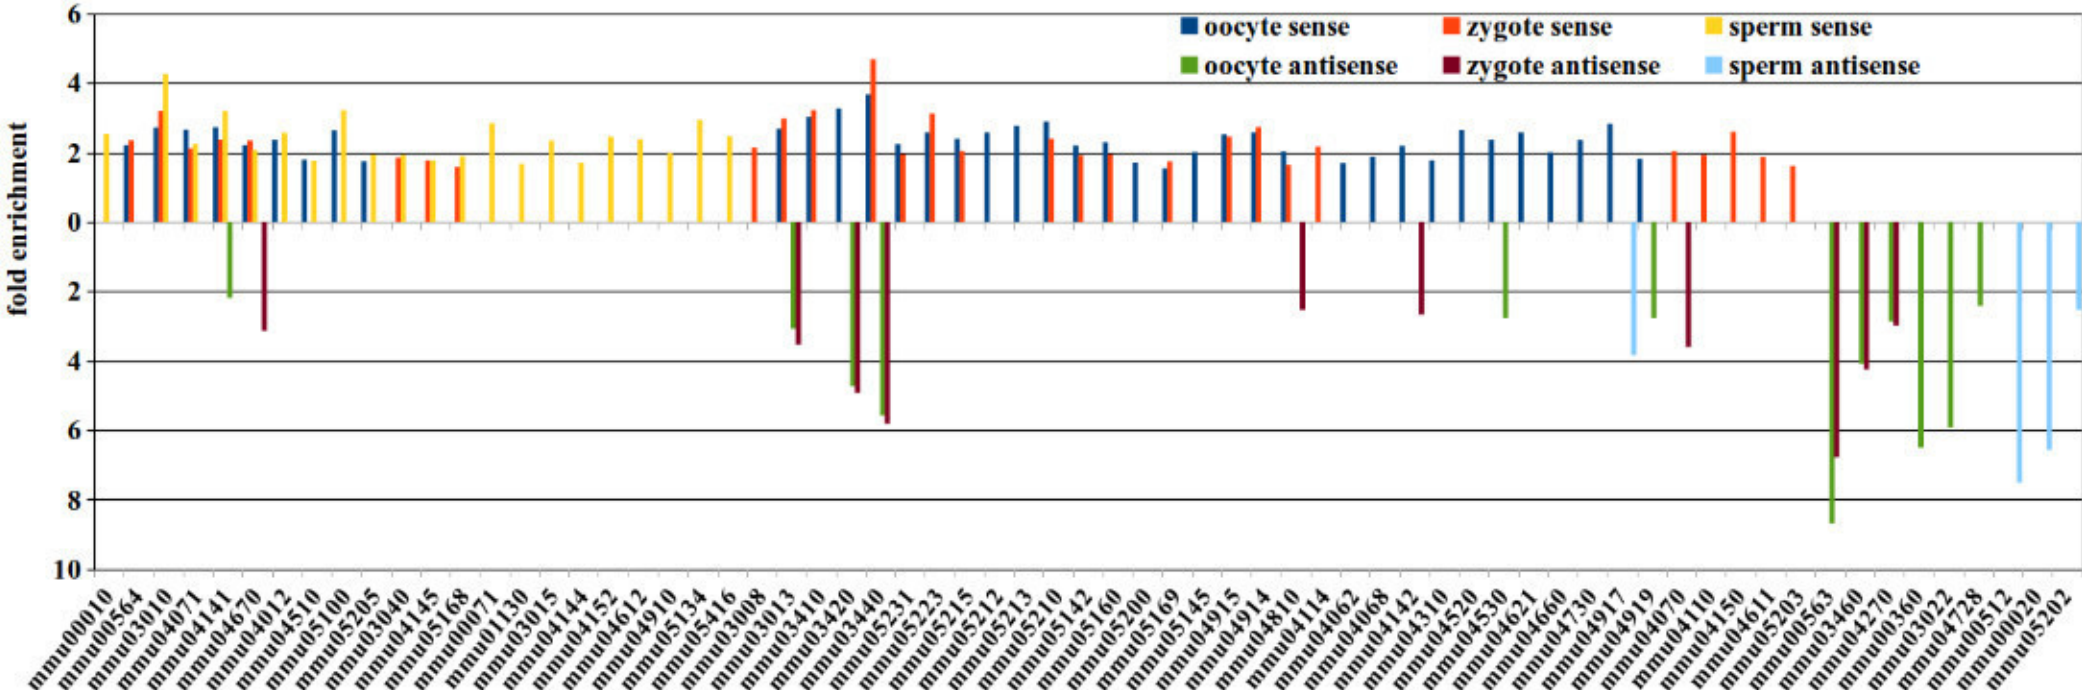

Supplementary Figure 6. KEGG enrichment analysis of transcripts containing RapiRNAs in their 5'UTR regions

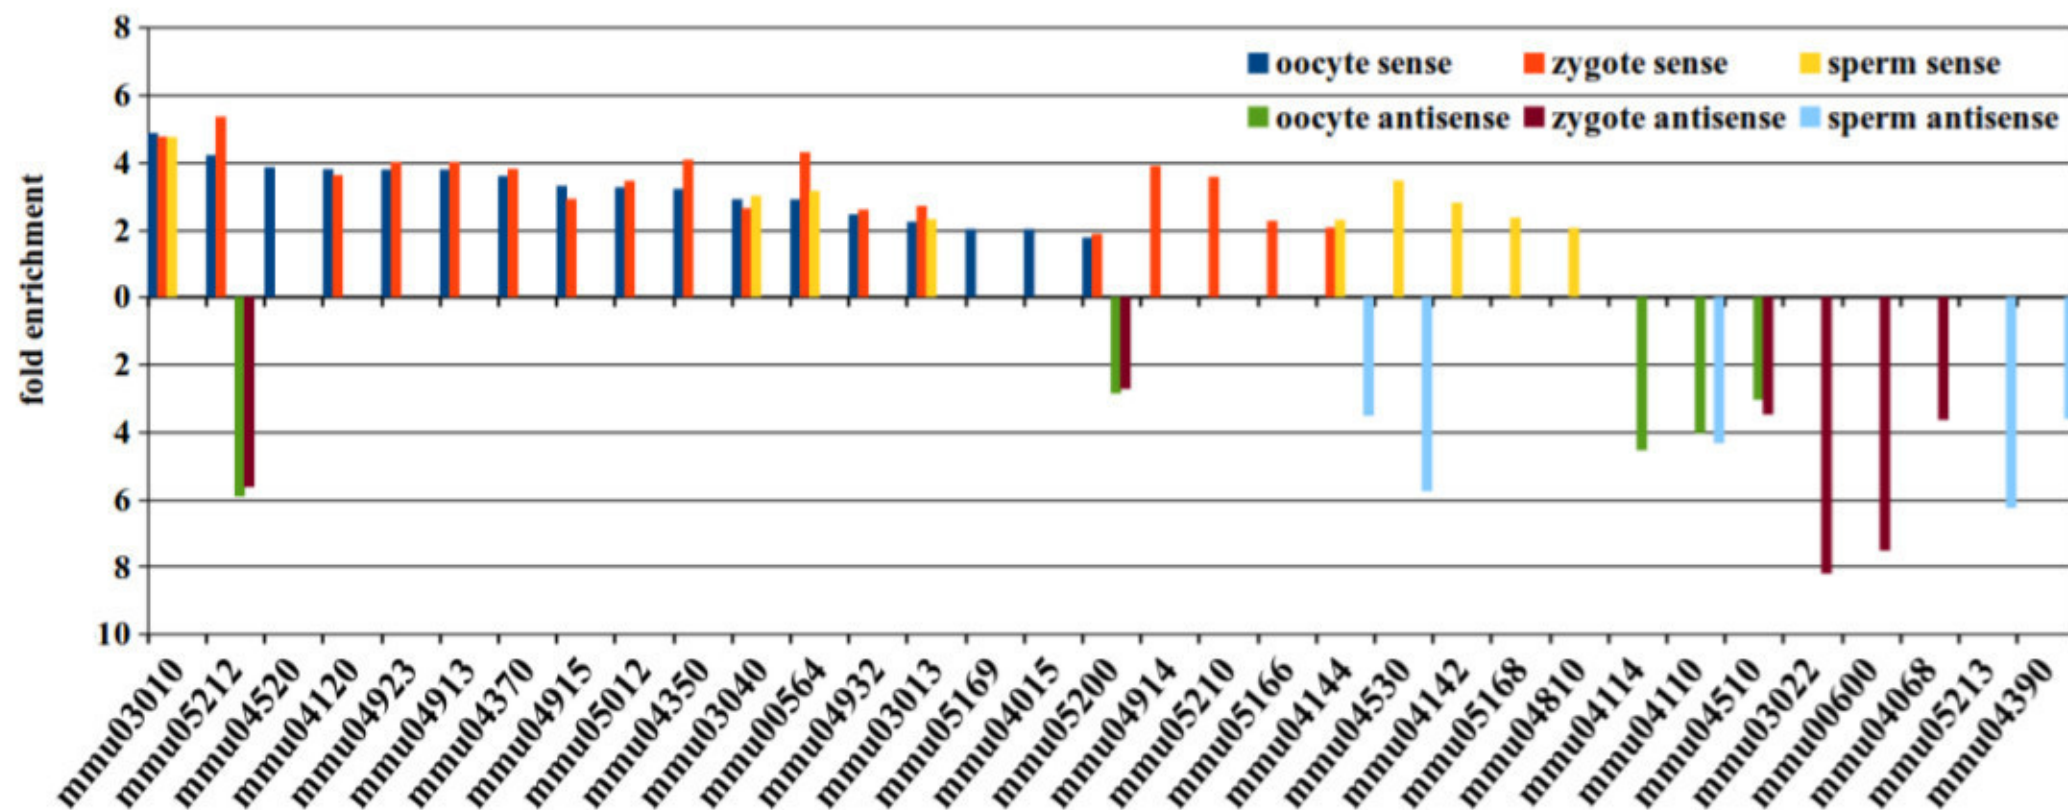

Caption:

| KEGG ID  | Pathway                        | KEGG ID  | Pathway                                   |
|----------|--------------------------------|----------|-------------------------------------------|
| mmu00564 | Glycerophospholipid metabolism | mmu04520 | Adherens junction                         |
| mmu00600 | Sphingolipid metabolism        | mmu04530 | Tight junction                            |
| mmu03010 | Ribosome                       | mmu04810 | Regulation of actin cytoskeleton          |
| mmu03013 | RNA transport                  | mmu04913 | Ovarian steroidogenesis                   |
| mmu03022 | Basal transcription factors    | mmu04914 | Progesterone-mediated oocyte maturation   |
| mmu03040 | Spliceosome                    | mmu04915 | Estrogen signaling pathway                |
| mmu04015 | Rap1 signaling pathway         | mmu04923 | Regulation of lipolysis in adipocytes     |
| mmu04068 | FoxO signaling pathway         | mmu04932 | Non-alcoholic fatty liver disease (NAFLD) |
| mmu04110 | Cell cycle                     | mmu05012 | Parkinson's disease                       |
| mmu04114 | Oocyte meiosis                 | mmu05166 | HTLV-I infection                          |
| mmu04120 | Ubiquitin mediated proteolysis | mmu05168 | Herpes simplex infection                  |
| mmu04142 | Lysosome                       | mmu05169 | Epstein-Barr virus infection              |
| mmu04144 | Endocytosis                    | mmu05200 | Pathways in cancer                        |
| mmu04350 | TGF-beta signaling pathway     | mmu05210 | Colorectal cancer                         |
| mmu04370 | VEGF signaling pathway         | mmu05212 | Pancreatic cancer                         |
| mmu04390 | Hippo signaling pathway        | mmu05213 | Endometrial cancer                        |
| mmu04510 | Focal adhesion                 |          |                                           |

**Supplementary Figure 7. Enrichment analysis of potentially target genes by RapiRNAs in their UTR regions with respect to MGI phenotypes**

**A) 3' UTR in sense  
oocyte**

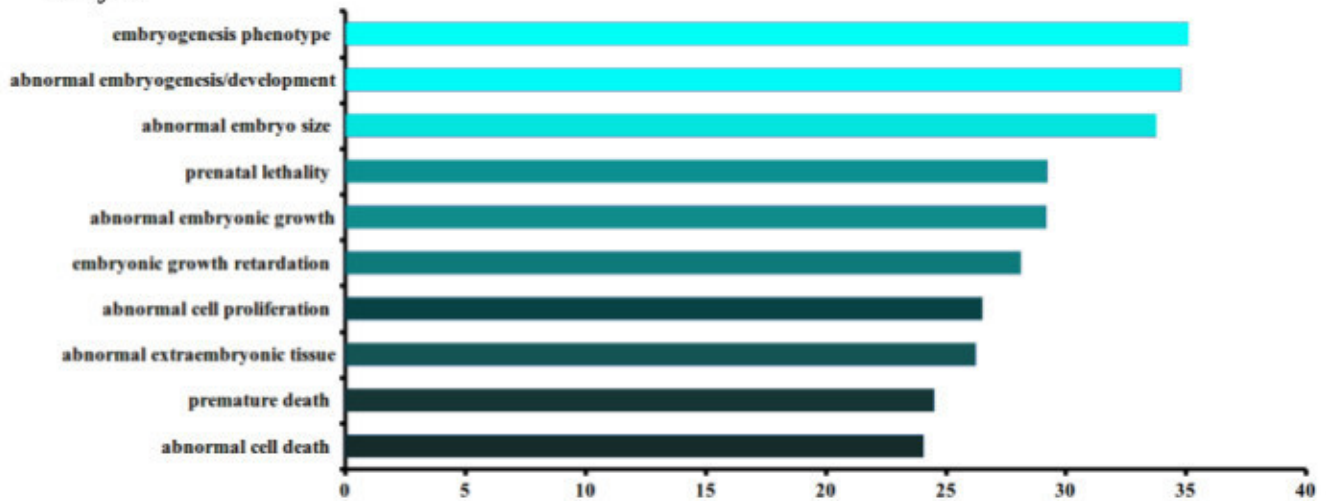

**zygote**

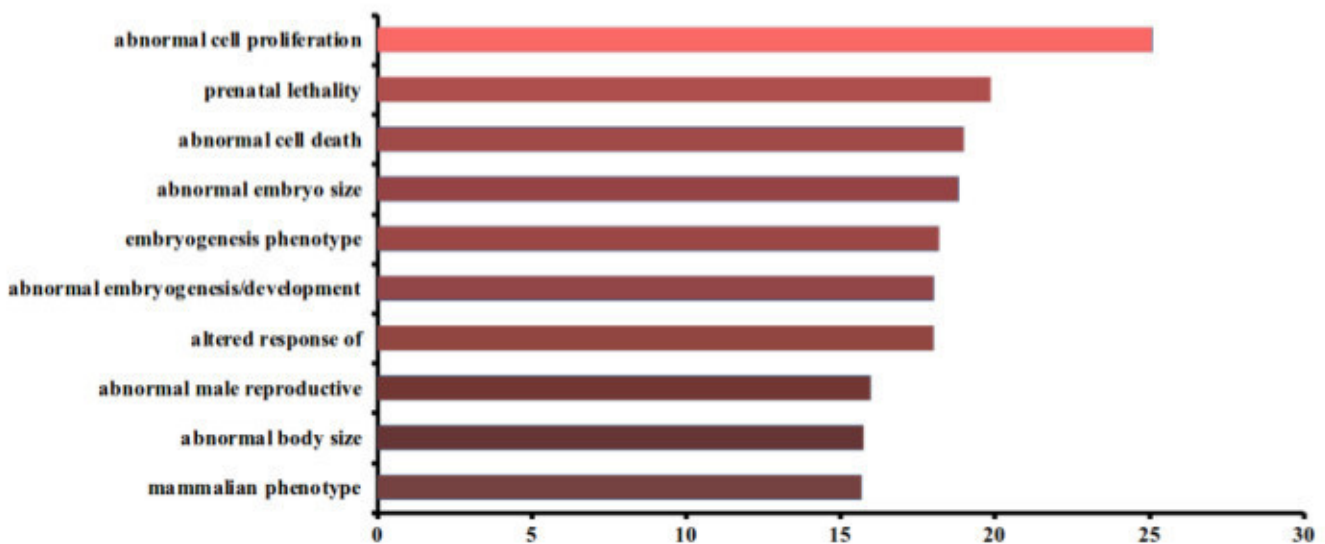

**sperm**

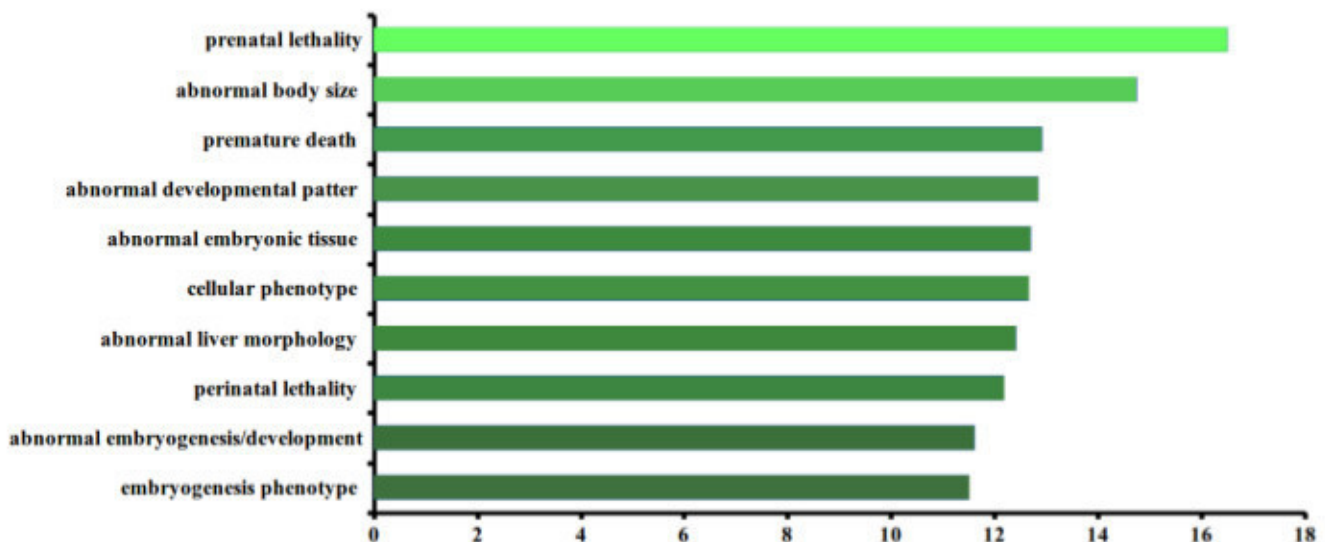



**Supplemental Table 1. Datasets of the piRBASE databases used to generate the IPpiRNA db used in this study.**

| piRBASE ID | PubMed   | Accession | Series     | Uniq Seq | Method     | Tissue                         |
|------------|----------|-----------|------------|----------|------------|--------------------------------|
| 5          | 16751777 | N/A       | N/A        | 3482     | MILI IP    | testis                         |
| 11         | 22121019 | GSM822760 | GSE32184   | 568759   | Miwi IP    | Testes, C57BL/6 Adult Miwi +/+ |
| 12         | 22121019 | GSM822758 | GSE32184   | 720903   | Miwi IP    | Testes, C57BL/6 P14 Miwi +/+   |
| 13         | 22121019 | GSM822759 | GSE32184   | 575786   | Miwi IP    | Testes, C57BL/6 P20 Miwi +/+   |
| 31         | 22842725 | GSM684624 | GSE27622   | 1068849  | Miwi CLIP  | C57BL/6 adult testis           |
| 32         | 22842725 | GSM684625 | GSE27622   | 464287   | Miwi CLIP  | C57BL/6 adult testis           |
| 33         | 22842725 | GSM684626 | GSE27622   | 118015   | Miwi CLIP  | C57BL/6 adult testis           |
| 34         | 22842725 | GSM684627 | GSE27622   | 129214   | Miwi CLIP  | C57BL/6 adult testis           |
| 35         | 22842725 | GSM684620 | GSE27622   | 249590   | Mili CLIP  | C57BL/6 adult testis           |
| 36         | 22842725 | GSM684621 | GSE27622   | 187442   | Mili CLIP  | C57BL/6 adult testis           |
| 37         | 22842725 | GSM684622 | GSE27622   | 167997   | Mili CLIP  | C57BL/6 adult testis           |
| 38         | 22842725 | GSM684623 | GSE27622   | 194293   | Mili CLIP  | C57BL/6 adult testis           |
| 60         | 18922463 | GSM319956 | GSE12757   | 334652   | Mili IP    | 16.5 dpc testis                |
| 61         | 18922463 | GSM319957 | GSE12757   | 1086617  | Miwi2 IP   | 16.5 dpc testis                |
| 72         | 17446352 | GSM179088 | GSE7414    | 136417   | Mili IP    | 10 dpp testis                  |
| 81         | 22020280 | N/A       | E-MTAB-730 | 2880834  | Mili IP    | wild_type_1 E16.5 fetal testis |
| 82         | 22020280 | N/A       | E-MTAB-730 | 3229065  | Mili IP    | wild_type_2 E16.5 fetal testis |
| 87         | 22020280 | N/A       | E-MTAB-730 | 1883101  | Miwi2 IP   | wild_type_1 E16.5 fetal testis |
| 88         | 22020280 | N/A       | E-MTAB-730 | 1795983  | Miwi2 IP   | wild_type_2 E16.5 fetal testis |
| 121        | 20534472 | GSM545783 | GSE21763   | 387977   | Mov10L1 IP | wild type adult testis         |
| 132        | 20022248 | GSM475279 | GSE19172   | 1815424  | Miwi IP    | adult testis                   |
| 133        | 20022248 | GSM475280 | GSE19172   | 2625847  | Mili IP    | adult testis                   |
| 134        | 24787618 | N/A       | N/A        | 879      | Miwi CLIP  | elongating spermatids          |

List of piRNA datasets download from piRBASE (<http://www.regulatoryrna.org/database/piRNA/index.html>) used for generated de IPpiRNAdb. Dataset identification number in piRBASE (piRBASE ID), ID of the publication of the dataset in PubMed (PubMed), accession numbers of datasets in NCBI Gene Expression Omnibus database (Accession, Series), number of unique sequence in dataset (Uniq Seq), method and target of immunoprecipitation (Method) and tissue and developmental time used for the immunoprecipitation (Tissue), were showed in the table.

Supplementary Table 2-5 can be downloaded from GitHub:

[https://github.com/edugenetico/Immunoprecipitation-piRNA-database/raw/Supplemental-Tables/Supplemental\\_Tables2-5.pdf](https://github.com/edugenetico/Immunoprecipitation-piRNA-database/raw/Supplemental-Tables/Supplemental_Tables2-5.pdf)
